# Supplementary material for: Corneal biomechanics and biomechanically corrected intraocular pressure in primary open-angle glaucoma, ocular hypertension and controls
Source: PubMed Central journal article supplement — Br J Ophthalmol. 2019 Mar 28;104(1):121–6. doi: 10.1136/bjophthalmol-2018-313493 (PMC6922012; doi:10.1136/bjophthalmol-2018-313493), 2019-03-28
Supplement: bjophthalmol-2018-313493supp001.pdf [file bjophthalmol-2018-313493supp001.pdf]

---

**Supplementary** Summary of parameters provided by the Corvis ST

**Table 1.** used in the study

---

|                                           |                                                                                                                                                                                              |
|-------------------------------------------|----------------------------------------------------------------------------------------------------------------------------------------------------------------------------------------------|
| Deformation Amplitude (DA)                | The maximum displacement of the corneal apex in the anterior-posterior direction at the highest concavity moment.                                                                            |
| Deformation Amplitude Ratio (DA Ratio)    | The Deformation amplitude measured at 1 or 2 mm from the centre of the cornea in the nasal-temporal region                                                                                   |
| Inverse Concave Radius                    | The inverse function of the radius of curvature at the highest concavity state ( $1/R$ ) is plotted and the integrated sum is calculated between the first and second applanation events     |
| Stiffness Parameter at A1 (SPA1 or SP-HC) | Resultant pressure (adjusted IOP at A1 minus bIOP) divided by deflection amplitude at applanation 1 or highest concavity. Therefore, stiffness is measured by force divided by displacement. |
| bIOP                                      | An estimate of corrected intraocular pressure which is able to compensate for central corneal thickness, age and biomechanics                                                                |

---
